1 **CRISPR/Cas9 gene editing for the creation of an MGAT1 deficient**

2 **CHO cell line to control HIV-1 vaccine glycosylation**

3 High mannose CHO line improves gp120 binding to antibodies

4

5 Authors: Gabriel Byrne<sup>1</sup>, Sara M. O'Rourke<sup>1</sup>, David L. Alexander<sup>1</sup>, Bin Yu<sup>1</sup>,

6 Rachel C. Doran<sup>1</sup>, Meredith Wright<sup>1</sup>, Qiushi Chen<sup>2</sup>, Parastoo Azadi<sup>2</sup>, and Phillip W.

7 Berman<sup>1</sup>

8

9 Affiliations: <sup>1</sup>Department of Biomolecular Engineering, University of California Santa

10 Cruz, Santa Cruz, California United States of America. <sup>2</sup>Complex Carbohydrate

11 Research Center, University of Georgia, Athens, Georgia, United States of America.

12

13

14 Keywords: HIV vaccine, glycosylation, CHO cells, neutralizing antibodies, gene editing,

15 CRISPR/Cas9, gp120

16

## 17 **Abstract**

18

19 Over the last decade multiple broadly neutralizing monoclonal antibodies (bN-mAbs) to  
20 the HIV-1 envelope protein, gp120, have been described. Surprisingly many of these  
21 recognize epitopes consisting of both amino acid and glycan residues. Moreover, the  
22 glycans required for binding of these bN-mAbs are early intermediates in the N-linked  
23 glycosylation pathway. This type of glycosylation substantially alters the mass and net  
24 charge of HIV envelope (Env) proteins compared to molecules with the same amino  
25 acid sequence but possessing mature, complex (sialic acid containing) carbohydrates.  
26 Since cell lines suitable for biopharmaceutical production that limit N-linked  
27 glycosylation to mannose-5 (Man<sub>5</sub>) or earlier intermediates are not readily available, the  
28 production of vaccine immunogens displaying these glycan dependent epitopes has  
29 been challenging. Here we report the development of a stable suspension adapted  
30 CHO cell line that limits glycosylation to Man<sub>5</sub> and earlier intermediates. This cell line  
31 was created using the CRISPR/Cas9 gene editing system and contains a mutation that  
32 inactivates the gene encoding Mannosyl (Alpha-1,3-)-Glycoprotein Beta-1,2-N-  
33 Acetylglucosaminyltransferase (MGAT1). Monomeric gp120s produced in the MGAT1-  
34 CHO cell line exhibit improved binding to prototypic glycan dependent bN-mAbs  
35 directed to the V1/V2 domain (e.g. PG9) and the V3 stem (e.g. PGT128 and 10-1074)  
36 while preserving the structure of the important glycan independent epitopes (e.g.  
37 VRC01). The ability of the MGAT1- CHO cell line to limit glycosylation to early  
38 intermediates in the N-linked glycosylation pathway, without impairing the doubling time

39 or ability to grow at high cell densities, suggest that it will be a useful substrate for the  
40 biopharmaceutical production of HIV-1 vaccine immunogens.

41

## 42 **Introduction**

43 Despite thirty years of research, a vaccine capable of providing protection  
44 against human immunodeficiency virus type 1 (HIV) has yet to be described. However,  
45 considerable progress towards this goal has been achieved with the elucidation of the  
46 3-dimensional structure of the HIV-1 envelope proteins (monomeric gp120 and trimeric  
47 gp140) and the characterization of multiple broadly neutralizing monoclonal antibodies  
48 (bN-mAbs) (1-5). As headway toward a protective vaccine continues, the practicalities  
49 of large-scale vaccine production must be addressed. A growing body of evidence  
50 indicates that the N-linked glycosylation structure will be a critical factor in both the  
51 design and manufacture of any HIV vaccine (6-8).

52 Beginning in 2009, we learned that multiple bN-mAbs recognized glycan  
53 dependent epitopes on the HIV envelope protein, gp120. In an unanticipated  
54 development, several families of bN-mAbs require mannose-5 (Man<sub>5</sub>) and/or mannose-9  
55 (Man<sub>9</sub>) for binding to key epitopes of gp120 (6, 9-11). As these bN-mAbs were being  
56 described, the data from the RV144 HIV vaccine trial was released. This study provided  
57 evidence for the first time that vaccination could prevent HIV infection in humans (12).  
58 The regimen used in this trial involved immunization with a bivalent gp120 vaccine  
59 (AIDSVAX B/E) to stimulate an antibody response as well as immunization with a  
60 recombinant canarypox vector to stimulate a cell mediated immune response (13-15).  
61 This immunization protocol resulted in modest (31.2%) but significant vaccine efficacy

62 (12). Examination of the gp120 subunit vaccines used in the RV144 trial showed that  
63 both components (MN-rgp120 and A244-rgp120) were enriched for complex, sialic acid  
64 containing glycans and lacked the high-mannose glycosylation found on the surface of  
65 virions and native envelope proteins required to bind the new class of glycan dependent  
66 bN-mAbs(16-20). Thus, differences in glycosylation between the vaccine immunogens  
67 from the RV144 trial and virus particles could, in part, explain the low efficacy of RV144  
68 and other gp120 based vaccines and their inability to elicit broadly neutralizing  
69 antibodies (bN-mAbs). Previously we reported that the same gp120s used in the RV144  
70 trial could be modified to bind multiple bN-mAbs when expressed in a cell line (HEK 293  
71 GnT1<sup>-</sup>) that limited N-linked glycosylation to Man<sub>5</sub>, or earlier species (e.g. Man<sub>8</sub>, Man<sub>9</sub>)  
72 (21). While in theory this cell line could be used to produce a glycan optimized gp120  
73 vaccine, in reality this is not practical. The HEK 293 GnT1<sup>-</sup> system is not suitable for  
74 clinical and large-scale production due to genetic instability and the inability to grow for  
75 sustained periods at high cell densities (22, 23).

76 CHO cells have long been the substrate of choice for the production of  
77 therapeutic glycoproteins. This is due to their ability to grow at high densities in serum-  
78 free suspension cultures, sustain high levels of protein expression over prolonged  
79 fermentation cycles, and incorporate complex glycans on exogenously expressed  
80 proteins (24-26). Typical glycoproteins contain only a few N-linked glycans, which aid in  
81 protein folding, intracellular trafficking. When these glycans terminate in sialic acid  
82 residues they increase resistance to proteolysis and extend serum half-life *in vivo* (27-  
83 29). Because of these physical and pharmacokinetic benefits, recombinant glycoprotein  
84 expression efforts have historically focused on maximizing the amount of complex, sialic

85 acid containing glycans per molecule. Although modern production technology provides  
86 the means to express and purify properly folded recombinant glycoproteins at large  
87 scale, controlling the glycosylation has been a persistent problem for most glycoproteins  
88 due to the “non-templated” nature of glycosylation (30-32). The final glycan structure of  
89 proteins with only a few N-linked glycosylation sites can be highly variable with respect  
90 to the glycan structure branching, saccharides present, sialic acid content, and net  
91 charge. Glycosylation heterogeneity is known to result from a variety of variables  
92 including: cell type, protein expression levels, cell culture conditions, monosaccharide  
93 donor availability, and protein structure (30, 33-36). Controlling glycosylation  
94 heterogeneity in gp120 is particularly problematic due to the fact that it contains an  
95 average of 25 potential N-linked glycosylation sites (PNGS), comprising approximately  
96 50% of the mass of the mature protein (37-40). Each glycan site may be different in  
97 composition than others on the same molecule or different at the same position from  
98 molecule to molecule. Variance is so great that 79 different glycan structures have been  
99 found to occur a single position in envelope proteins expressed in normal CHO cells  
100 (41).

101 In this paper we address the problems of glycosylation heterogeneity and bN-mAb  
102 binding in the large-scale production of recombinant envelope proteins by the  
103 development of a mutant CHO cell line (MGAT1<sup>-</sup> CHO) in which the Mannosyl (Alpha-  
104 1,3-)-Glycoprotein Beta-1,2-N-Acetylglucosaminyltransferase (MGAT1) gene has been  
105 inactivated using CRISPR/Cas9 gene editing. The nomenclature for MGAT1 gene has  
106 changed over the years and was previously referred to as the GnT1 gene. Inactivation  
107 or deficiency of the MGAT1 limits N-linked glycosylation to early oligo-mannose glycans

108 (Man<sub>5-9</sub>) and enhances the binding of bN-mAbs to glycans dependent epitopes, as  
109 compared to earlier gp120 vaccines produced in normal CHO cells. Although other  
110 CHO cell lines , such as CHO Lec1, have been described that similarly limit  
111 oligomannose-structures, they grow slowly, and differ from parental cell lines in  
112 morphology and growth characteristics (42, 43). Thus, the development of a precision-  
113 engineered CHO cell line resulting from by CRISPR/Cas9 gene editing, is a desirable  
114 alternative for HIV vaccine manufacturing. This cell line should be useful for the  
115 production of stable cell lines suitable for the production HIV vaccines as well as other  
116 biopharmaceuticals where limiting the incorporation of sialic acid is beneficial.

117

118

119

## 120 **Results**

### 121 **Silencing of CHO-S MGAT1 Gene**

122 The goal of this project was to make an MGAT1 deficient CHO-S cell line using  
123 CRIPSR/Cas9. With this gene knocked out, complex, sialic acid containing, glycans  
124 cannot be formed and N-linked glycosylation is not processed beyond the oligomannose  
125 Man<sub>5</sub> structure (Fig. 1). The CRISPR/Cas9 gene editing system allows for specific  
126 targeting of genes for deletion or modification by introducing double stranded breaks  
127 (DSB) followed by non-homologous end joining (NHEJ) or homology directed repair  
128 (HDR) (44, 45). We utilized a CRISPR/Cas9 nuclease vector containing an GFP  
129 reporter gene (Materials and Methods). After insertion of guide sequences, the vector

130 contained all of the elements needed to induce a double stranded break in the MGAT1  
131 gene. The sequence of the CHO MGAT1 gene was identified from GenBank, gene ID:  
132 100682529 (46). Three target specific double stranded guide sequences were ligated  
133 into the vector between a U6 promoter and a tracrRNA sequence. The same vector  
134 encodes the Cas9 endonuclease and an orange fluorescent protein reporter gene,  
135 separated by a self-cleaving 2A peptide linker. This system allows for a single plasmid  
136 to encode for both the Cas9 and a complete gRNA, enabling the use of non-Cas9  
137 expressing cells. Following ligation of these guide sequences, the vectors were  
138 transfected into CHO-S cells using the MaxCyte electroporation system (Fig. 2). Targets  
139 1 and 2 were introduced individually; target 3 plasmid was mixed and added together in  
140 equal ratio with target 2, creating three separate pools of transfected cells. Twenty-four  
141 hours post transfection samples were serially diluted across five 96 well flat-bottoms  
142 plates at a calculated density of 0.5 cells per well. The plates were examined daily, and  
143 wells with more than a single colony was discarded. Across the 15 total plates, between  
144 15 and 30 wells per plate contained single viable colonies that were transferred to 24  
145 well plates upon reaching 20% confluency after 12 to 15 days. Wells in the 96 well  
146 plates that did not have at least several dozen cells by day 15 were discarded. A total of  
147 166 colonies were expanded to 24 well plates: 55 from target 1 pool, 67 from target 2  
148 pool, and 44 from combined target 2/3 pool.

149

150 **Fig 1. Simplified view of N-linked glycosylation pathway.** N-linked glycosylation  
151 begins in the endoplasmic reticulum with the en-block transfer of a highly conserved  
152  $\text{Glc}_3\text{Man}_9\text{GlcNAc}_2$  structure (left) to asparagine residues within the N-X-S/T motif of

153 nascent proteins. This initial structure is sequentially trimmed to Man<sub>9</sub>GlcNAc<sub>2</sub> and then  
154 Man<sub>5</sub>GlcNAc<sub>2</sub> (center) as the protein moves from the ER to the Golgi apparatus. The  
155 enzyme, Mannosyl (Alpha-1,3-)-Glycoprotein (Beta-1,2)-N-Acetylglucosaminyl-  
156 transferase (MGAT1, red box) adds an N-acetylglucosamine to the Man<sub>5</sub> structure and  
157 is required to enable other glycosyltransferases to add monosaccharides creating hybrid  
158 (second from right) and complex (right) glycoforms. Treatment with endoglycosidase H  
159 (Endo H) cleaves simple, oligomannose containing glycans from glycoproteins, but not  
160 complex sialic acid containing glycans. PNGase F removes both simple and complex  
161 glycans from glycoproteins (indicated by the arrows). Kifunensine and swainsonine are  
162 inhibitors that halt processing at the steps indicated. Dashed black arrows indicate  
163 multiple enzymatic steps. Figure adapted from Binley, J.M., et al., *Role of Complex*  
164 *Carbohydrates in Human Immunodeficiency Virus Type 1 Infection and Resistance to*  
165 *Antibody Neutralization*. Journal of Virology, 2010. 84(11): p. 5637-5655. (47)

166

167

168 **Fig 2. Flow chart of MGAT1 gene editing and cell line selection strategy.** (A) A  
169 plasmid containing the Cas9 nuclease, tracrRNA, and a guide RNA (gRNA) sequence  
170 was electroporated into suspension adapted CHO-S cells. (B) Twenty-four hours  
171 following transfection, the cells were distributed into 96 well tissue culture plates at a  
172 density of 0.5 cells/well. (C) Between 12 and 15 days later, wells with 20% or greater  
173 confluency were transferred to 24 well plates. (D) After five days of growth in 24 well  
174 plates, a 0.2mL aliquot was removed from each well and cells were tested for the ability  
175 to bind fluorescein labeled Galanthus nivalis lectin (GNA). (E) GNA binding cells were



176 then expanded to shake flasks and cell lines were transiently transfected with a gene  
177 encoding A244-rgp120. The cell culture supernatants were then collected after five days  
178 and tested for binding of gp120 to the prototypic glycan dependent, broadly neutralizing  
179 monoclonal antibody, PG9. (G) The gene encoding MGAT1 was sequenced from GNA  
180 binding cell lines with that exhibited robust growth and the ability to secrete PG9 binding  
181 gp120. The specific mutations induced by non-homologous end joining repair (NHEJR)  
182 were determined by Sanger sequencing.

183

## 184 **Lectin binding to detect MGAT1 gene inactivation**

185 If the MGAT1 gene were inactivated, we expect glycoproteins to possess exclusively  
186 oligo-mannose forms of N-linked glycosylation, with a preponderance of Man<sub>5</sub> isoforms  
187 on cell surface and secreted proteins. The lectin GNA recognizes glycans with terminal  
188 alpha-D mannose and is unable to bind to sialic acid containing complex glycans (48).  
189 Accordingly we used fluorescein conjugated GNA to determine whether CRISPR/Cas9  
190 transfected cells possessed a phenotype characteristic of cells with an inactivated  
191 MGAT1 gene. GNA does not require Ca<sup>2+</sup> or Mg<sup>2+</sup> cofactors to bind, allowing the use of  
192 10μM EDTA to ameliorate cell clumping during repeated centrifugation and wash steps.  
193 While MGAT1<sup>-</sup> CHO cells and control HEK 293 GnT1<sup>-</sup> cells bound to the GNA lectin, the  
194 wild type CHO-S cell line did not (Fig. 3). A total of 20 GNA binding cell lines from the  
195 original 166 candidates were selected on the basis of uniform GNA binding and the  
196 cultures were expanded for further analysis. Three days following initial GNA selection,

197 the 20 cell line candidates were re-examined and six were rejected for lack of uniform  
198 lectin binding across the sample population, leaving 14 candidates.

199

200 **Fig 3. GNA lectin probe for cell surface oligomannose glycan expression.** The  
201 GNA lectin binds glycan structures with terminal mannose and will not bind complex,  
202 sialic acid containing glycans. CHO-S cells were transfected with a plasmid designed to  
203 inactivate the MGAT1 gene by CRISPR/Cas9 gene editing (MGAT CHO). The cells  
204 were treated with fluorescein conjugated GNA lectin to screen for the incorporation of  
205 high mannose glycans in the cell membrane. HEK 293 GnT1<sup>-</sup> cells that also lack the  
206 MGAT1 gene served as a positive control (panels A and D) while normal CHO-S cells  
207 that possess an intact MGAT1 gene served as a negative control (panels B and E).  
208 Cells were visualized under 20 x magnification on a Leica DM5500 B widefield  
209 microscope using differential interference contrast (DIC) (upper panels A, B, C) or under  
210 illumination with 495nm light (lower panels D, E, and F).

211

## 212 **Expression of gp120 in MGAT1<sup>-</sup> CHO cell lines**

213 Based on positive lectin binding criteria, the 14 candidate cell lines were grown in  
214 125mL shake flasks (Fig. 2). Of those, the four fastest growing (3.4F10, 3.5D8, 3.5A2,  
215 and 3.4D9) were utilized for transient transfection with a gene encoding gp120 from the  
216 A244 strain of HIV-1 (A244-rgp120). Also transfected was the CHO-S parental cell line  
217 for comparison. This gp120 A244 had the sequence point mutations E332N and N334S,

218 introducing a PNGS at N332. Five days post transfection the culture media was  
219 harvested and secreted gp120 proteins were purified by immunoaffinity  
220 chromatography. The purified products were assayed for protein yield, tested for identity  
221 using immunoblot analysis (data not shown) and for the ability to bind the glycan  
222 dependent bNAb, PG9 by fluorescent immune assay (FIA) (Fig. 4). Previous studies  
223 have shown that this bNAb requires Man<sub>5</sub> at position N160 in the V1/V2 domain for  
224 binding (3). The results from this study confirmed that the MGAT1<sup>-</sup> CHO cell lines could  
225 bind this antibody whereas gp120 produced in the parental CHO-S cell line was unable  
226 to bind PG9. From this analysis, a single MGAT1<sup>-</sup> CHO cell line, 3.4F10, was selected  
227 for further characterization and analysis (Fig. 4).

228 To be a viable substrate for biopharmaceutical production, the growth and protein yield  
229 of the knockout line had to be comparable to the parental line. In transient transfection  
230 experiments the calculated recovery of purified protein was 35.4mg/L for the 3.4F10  
231 MGAT1<sup>-</sup> CHO line and 32.2mg/L for the parental CHO-S line. Production of the same  
232 protein in HEK 293 GnTI<sup>-</sup> cells by transient transfection yielded 1.9mg/L. We measured  
233 that the cell doubling time for the 3.4F10 MGAT1<sup>-</sup> CHO cell line in BalanCD CHO  
234 Growth A media was 20.7 hours in a 1L shaker flask during logarithmic growth phase,  
235 reaching a density of  $1.9 \times 10^7$  cells/mL. This was similar to the parental CHO-S  
236 population doubling time of 19.0 hours that achieved cell densities of  $1.6 \times 10^7$  cells/mL.  
237 By comparison, the GnTI<sup>-</sup> HEK 293 cell line had a logarithmic cell doubling time of 23.3  
238 hrs. and achieved a maximal cell density of  $4.20 \times 10^6$  cells/mL when grown in Freestyle  
239 293 media.

240

241

242 **Fig 4. Screening and Sequence Analysis of MGAT1<sup>-</sup> CHO cell line:** Colonies

243 selected after MGAT1 gene inactivation were transiently transfected with a gene  
244 encoding A244-rgp120. Cell culture supernatants were collected and tested for binding  
245 by the glycan dependent bN-mAb PG9. Based on PG9 binding studies the MGAT  
246 genes from selected cell lines were amplified by PCR and sequenced. (A) PG9 binding  
247 to gp120 in cell culture supernatants of transiently transfected MGAT1<sup>-</sup> CHO lines  
248 3.5D9, 3.5D8, 3.4F10, 3.5A2, and by supernatants from gp120 transfected CHO-S and  
249 GnTI<sup>-</sup> 293 HEK cells. (B) Diagram of the unaltered CHO-S MGAT1 gene target section  
250 with guide RNA (gRNA) complement sequence shown in blue and the protospacer  
251 adjacent motif (PAM) underlined in bold type. (C) Sequences of the MGAT1 gene for  
252 3.4F10 and 3.5D8 cell lines both had the same single base insertion, shown in black  
253 box. (D) The sequence from the cell line 3.5A2 with bases deleted shown in box. (E)  
254 The bases deleted 3.5D9 cell line sequences are indicated by the box.

255

256 **Identification of CRISPR/Cas9 induced genetic alteration**

257 To confirm that MGAT1 gene had been inactivated, we sequenced the gene from the  
258 3.4F10 line and the next three best candidates. An extra thymidine had been inserted at  
259 the Cas9 cleavage site of the 3.4F10 line MGAT1 gene, introducing a frame shift  
260 mutation. This mutation resulted in 23 altered codons and the insertion of a premature  
261 stop codon. The 3.5D8 line contained the same mutation, while 3.5D9 and 3.5A2 both  
262 had in frame deletions of 24 and 30 nucleotides respectively. The deleted codons of

263 3.5D9 and 3.5A2 corresponded to the transmembrane domain of the GnTI protein  
264 leaving the active extracellular domain intact. The diminished binding of gp120s  
265 produced in the 3.5D9 and 3.5 A2 clones to PG9 suggest that partial MGAT1 activity  
266 remains in these two clones compared to the 3.4F10 clone that, like gp120 produced in  
267 GnTI<sup>-</sup> cells, exhibits improved binding to PG9 (Figure 4). Given that the single base  
268 insertion in the 3.4F10 MGAT1 gene resulted in a frame shift 51 nucleotides into a  
269 1276bp long gene, it is highly unlikely that the function of this gene could be restored by  
270 random mutation.

271

## 272 **Characterization of MGAT1<sup>-</sup> CHO gp120 glycosylation**

273 Two additional methods (endoglycosidase digestion and mass spectrometry  
274 analysis using MALDI-TOF-MS) were used to further characterize the N-linked  
275 glycosylation incorporated in A244-rgp120 produced by the 3.4F10 MGAT1<sup>-</sup> CHO cell  
276 line. Immunoaffinity purified, monomeric A244 gp120 produced by the CHO-S, HEK 293  
277 GnTI<sup>-</sup>, and MGAT1<sup>-</sup> CHO cell lines were digested overnight by endoglycosidases  
278 PNGase F and Endo H, then analyzed by SDS-PAGE and stained with Coomassie blue  
279 dye (Fig. 5). Endo H cleaves N-linked high-mannose glycan structures, and not  
280 complex, sialic acid containing glycans. When the protein produced in the HEK 293  
281 GnTI<sup>-</sup> and MGAT1<sup>-</sup> CHO cell lines was compared to the proteins produced in CHO-S  
282 cell lines, we noted a reduction in mass of approximately 20kD. This is in keeping with  
283 the smaller mass of the Man<sub>5</sub> glycoform compared to that of the hybrid and complex  
284 glycans found on CHO-S produced material. Following Endo H digestion, the protein

285 produced in the CHO-S cell line was largely unaltered, indicating that it possessed the  
286 normal complex, sialic acid containing glycans. In contrast, the proteins produced in the  
287 MGAT1<sup>-</sup> CHO and HEK 293 GnTI<sup>-</sup> cells were reduced to ~60kD in size. This result was  
288 consistent with the observation that approximately half the mass of a given gp120  
289 molecule can be attributed to N-linked glycosylation (47, 49, 50). The complete  
290 sensitivity of the proteins produced in the MGAT1<sup>-</sup> CHO and HEK 293 GnTI<sup>-</sup> cells to  
291 Endo H digestion suggests that the glycosylation of these cell lines is exclusively high-  
292 mannose. When digested with PNGase F, all samples dropped to the same size,  
293 confirming that undigested gp120 size variances were due to glycosylation differences.

294

295 **Fig 5. Endoglycosidase analysis of gp120 produced in MGAT1<sup>-</sup> CHO cell line.**

296 Purified A244 rgp120 recovered from transiently transfected CHO-S, MGAT1<sup>-</sup> CHO, or  
297 HEK 293 GnTI<sup>-</sup> cell lines was analyzed by SDS-PAGE following endoglycosidase  
298 treatment. Purified gp120s were reduced and denatured then treated with either  
299 endoglycosidase H (Endo H) or Peptide:N-Glycosidase F (PNGase F). The digests  
300 were then analyzed on 4-12% tris-glycine SDS PAGE gels and stained with Coomassie  
301 blue dye. Panel A, mock digests of gp120s produced in CHO-S, MGAT1<sup>-</sup> CHO, and  
302 HEK 293 GnTI<sup>-</sup> cells. Panel B, the same proteins in panel A, digested with  
303 endoglycosidase H (Endo H). Panel C, the same proteins in panel A, digested with  
304 PNGase F. The mobility of molecular weight markers is shown for each gel. The  
305 endoglycosidases proteins are visible as bands at 29kD (Endo H, panel B) and 36kD  
306 (PNGase F, panel C).

307

308

309

Additional studies were carried out to characterize the specific glycans

310 incorporated in the A244-rgp120 produced in the MGAT1<sup>-</sup> CHO and the CHO-S cell

311 lines. Using MALDI-TOF-MS (Fig. 6), we found that 56.4% of the N-linked glycans

312 present on the MGAT1<sup>-</sup> CHO produced gp120 were Man<sub>5</sub>, 19.2% were Man<sub>9</sub>, 11% were

313 Man<sub>8</sub> and the remainder were Man<sub>6</sub> and Man<sub>7</sub>. No complex sialic acid containing

314 glycans were detected (Table 1). The degree of fucosylation was also significantly

315 lowered; fucosylation was only on Man<sub>5</sub> glycoforms at the core GlcNAc and represented

316 3.16% of the total glycans present.

317 When the A244-rgp120 produced in CHO-S cells was examined, approximately 75% of

318 the glycans were complex or hybrid glycans and 25% represented the early

319 intermediates ranging from Man<sub>5</sub> to Man<sub>9</sub>. No high mannose species were detected with

320 core GlcNAc fucose attached, but nearly all hybrid and complex glycans were

321 fucosylated.

322

323

324 **Fig 6. MALDI-TOF analysis of glycans present on gp120 produced by CHO-S and**

325 **MGAT1<sup>-</sup> CHO cell lines.** The carbohydrates on purified A244 gp120s produced by

326 CHO-S (A) and MGAT1<sup>-</sup> CHO (B) cells were released by PNGase F digestion and

327 examined by MALDI-TOF MS as described in Materials and Methods. Pie charts

328 indicate the percentage of high-mannose (blue), complex (red), and potential bisected

329 (green) N-linked glycans. This analysis was performed by the Complex Carbohydrate  
330 Research Center at the University of Georgia.

331

332 Table 1. Percentage of different glycan species on gp120 produced by CHO-S and  
333 MGAT1<sup>-</sup> CHO cells.

| Glycan Species    | Cell Line |                        |
|-------------------|-----------|------------------------|
|                   | CHO-S     | MGAT1 <sup>-</sup> CHO |
| Man <sub>5</sub>  | 5.2%      | 56.4%                  |
| Man <sub>6</sub>  | 1.9%      | 4.5%                   |
| Man <sub>7</sub>  | 3.3%      | 7.1%                   |
| Man <sub>8</sub>  | 5.1%      | 11.4%                  |
| Man <sub>9</sub>  | 9.6%      | 19.2%                  |
| Complex or Hybrid | 75%       | 0.53%                  |

334 Percentages calculated from MALDI-TOF peak intensity.

335

## 336 **Binding multiple bN-mAbs to gp120 expressed in the MGAT1<sup>-</sup>** 337 **CHO cells.**

338 We next compared A244-rgp120 expressed in the MGAT1<sup>-</sup> CHO cells with A244-  
339 rgp120 produced in normal CHO-S cells for the ability to bind bN-mAbs in a FIA. A  
340 panel of prototypic bN-mAbs that recognize distinct sites of virus vulnerability in  
341 monomeric and trimeric HIV envelope proteins were utilized (Fig. 7). We noted a  
342 significant improvement in the binding of PG9, CH01 and CH03 to the proteins  
343 expressed in MGAT1<sup>-</sup> CHO cells and HEK 293 GnTI<sup>-</sup> cells compared to the CHO-S  
344 cells. These bN-mAbs are known to bind to epitopes in the V1/V2 domain that require  
345 Man<sub>5</sub> at the N160 glycosylation site (3). Similarly we noted a significant improvement in



346 the binding of the PGT126 and PGT128 bN-mAbs that require oligo-mannose glycans  
347 at the N301 and N332 glycosylation sites in the stem of the V3 domain (51). Mixed  
348 results were seen for the PGT121 family of bN-mAbs where the binding to gp120  
349 produced in both the MGAT1<sup>-</sup> CHO and HEK 293 GnTI<sup>-</sup> cells lines was lower than  
350 binding of these antibodies to gp120 produced in the CHO-S cell line. In contrast,  
351 binding to the 10-1074 bN-mAb, also in the PGT121 family, was unaffected by the  
352 cellular substrate used for production. These results demonstrate that changing the  
353 glycosylation, while leaving the amino acid sequence intact can significantly improve the  
354 antigenic structure of A244-rgp120 with respect to the binding of several bNAbs to  
355 glycan dependent epitopes. The effect of differences in glycosylation was also  
356 examined on the binding of the VRC01 bN-mAb, known to recognize a glycan  
357 independent epitope adjacent to the CD4 binding site (52). While this antibody bound to  
358 all of the envelope proteins tested, a small, but consistent improvement in binding was  
359 observed to the proteins produced in the MGAT1<sup>-</sup> CHO and HEK 293 GnTI<sup>-</sup> cells  
360 compared to the protein produced in the CHO-S cells. These studies suggest that the  
361 sialic acid containing hybrid and complex carbohydrates incorporated in normal cell  
362 lines in some way interfere with the VRC01 binding site on monomeric gp120. This  
363 same effect may be observed with further non-glycan dependent antibodies by  
364 decreasing the glycan interference.

365

366 **Fig 7. Comparison of bN-mAb binding to A244-rgp120 produced in MGAT1<sup>-</sup> CHO**  
367 **cells, CHO-S cells and HEK 293 GnTI<sup>-</sup> cells.** The binding of a panel of broadly  
368 neutralizing monoclonal antibodies to purified A244-rgp120 produced in MGAT1<sup>-</sup> CHO

369 cells, CHO-S cells, and HEK 293 GnTI<sup>-</sup> cells was measured in a Fluorescence  
370 Immunoassay (FIA). Briefly, purified proteins were captured onto wells of black 96 well  
371 microtiter plates coated with a mouse monoclonal antibody against the N-terminal gD  
372 tag present in all three proteins. Plates were then incubated with serial dilutions of bN-  
373 mAbs targeting: glycan-epitopes within the V1V2 domain (PG9, CHO1 and CHO3), the  
374 glycan-epitopes within the V3 domain (PGT128, PGT126, PGT121, 10-1074 and  
375 PGT122), or the CD4 binding site (VRC01). Plates were incubated with a 1:3,000  
376 dilution of AlexaFluor 488 conjugated goat-anti-human polyclonal antibody and binding  
377 is reported as Relative Fluorescence Units (RFU). FIA details are provided in Materials  
378 and Methods.

379

## 380 **MVM infectivity**

381 Minute virus of mice (MVM) is a small inactivation resistant virus that is ubiquitous in the  
382 environment and a major cause of bioreactor culture failure in biopharmaceutical  
383 manufacturing (53). As sialic acid is a major receptor for MVM infectivity, the MGAT1<sup>-</sup>  
384 CHO cell line we created might have the additional manufacturing benefit of being  
385 resistant to MVM infection (54). To investigate this possibility, the MGAT1<sup>-</sup> CHO cell line  
386 was tested for infectivity resistance to two strains of MVM using a qPCR assay and  
387 compared to wild type CHO-S MVM sensitivity. While the MGAT1<sup>-</sup> CHO cell line was  
388 similarly sensitive to the MVMp strain as wild type CHO-S cells, it was resistant to  
389 MVMc infection (Table 2). The receptor protein for MVM have not yet been identified,  
390 but it has been demonstrated that MVMp binds to sialic acid residues from both N and

391 O linked glycosylation (55-57). Knocking out MGAT1 does not alter the O-linked  
392 glycosylation pathway, perhaps explaining why the line remains sensitive to MVMp.  
393 MVMc is a more recently identified strain(58) with little information available on its  
394 binding to CHO or murine cells. Anything beyond noting the apparent dependence on  
395 complex N-linked glycosylation would be speculative at this point.

396

397 **Table 2: MVM infectivity assay**

| MVM type | Cell                   | MVM Cp | 18s Cp | MVM Copies | 18S Copies | MVM/18S  | MVM/18S  |
|----------|------------------------|--------|--------|------------|------------|----------|----------|
| MVMp     | CHO-S                  | 5.80   | 17.98  | 2.23E+10   | 2.03E+06   | 1.13E+04 | 1.13E+04 |
|          | MGAT1 <sup>-</sup> CHO | 6.11   | 18.74  | 1.95E+10   | 1.22E+06   | 1.49E+04 | 1.49E+04 |
| MVMc     | CHO-S                  | 7.91   | 18.91  | 5.04E+09   | 1.07E+06   | 4.84E+03 | 4.84E+03 |
|          | MGAT1 <sup>-</sup> CHO | 19.3   | 19.6   | 2.00E+06   | 6.91E+05   | 2.92E+00 | 2.92E+00 |

398

399 MVMp, minute virus of mice prototypic strain; MVMc, minute virus of mice Cutter strain;

400 Cp, QPCR crossover point, the cycle at which fluorescence from amplification becomes

401 greater than background, used to infer copy number against a standard curve with a

402 lower Cp; 18S, eukaryotic ribosomal subunit. All values are the mean of a triplicate set.

403 This infectivity assay was performed by IDEXX BioResearch (Columbia, MO).

404

## 405 **Adventitious agent testing**

406 The cell line was tested for the presence of mycoplasma, cross-species contamination,

407 and viral contaminants by IDEXX BioResearch (Columbia, MO). No adventitious agents

408 were detected. The full list and procedure are described in the supplemental materials.

## 409 Discussion

410 A major goal in HIV vaccine research is to develop immunogens that elicit  
411 bNAbs. The discovery that multiple bN-mAbs to HIV recognize glycan dependent  
412 epitopes has altered our thinking of how best to produce this vaccine. Instead of using  
413 standard CHO cell production cell lines, that incorporate complex and hybrid  
414 glycosylation, a cell line that limits glycosylation to high-mannose forms may be useful  
415 for gp120 immunogens. While we have long been able to produce properly folded Env  
416 protein monomers (gp120 and gp140) as indicated by the ability to bind CD4 with high  
417 affinity (59-63), until now we have not been able to replicate the glycan structures  
418 required for the binding of multiple families of bN-mAbs in expression systems suitable  
419 for large scale manufacturing.

420 The glycans that decorate the surface of native, virion-associated, HIV Env  
421 protein are typically enriched for high-mannose variants, normally found on early  
422 intermediate proteins within the ER and early Golgi (18, 19). This unusual restriction in  
423 glycan maturation is thought to be a consequence of steric hindrance occurring during  
424 the formation of trimeric virus spike structures (64). Additionally, the high density of  
425 PNGS that likely evolved as a glycan shield to prevent immune recognition of virus  
426 sequences (38, 47, 65) appears to limit glycosidase and glycosyltransferase  
427 modifications of Env glycans in the late ER and early Golgi Apparatus (GA) (18, 64).  
428 While expression of monomeric gp120 results in incorporation of complex glycosylation,  
429 trimeric spike formation results in incomplete glycosylation and enrichment of virions  
430 with high-mannose glycans (18, 19). These differences in glycosylation might explain  
431 the inability of previous HIV vaccines to elicit bNAbs to glycan dependent epitopes in

432 humans. However they don't explain the inability of previous vaccines to elicit bNAbs to  
433 epitopes such as VRC01 that were present in most gp120 vaccines expressed in  
434 normal CHO cells. Earlier vaccines such as the AIDSVAX B/E used in the RV144 trial  
435 largely possessed complex sialic acid containing glycans and lacked the high-mannose  
436 glycans required for a variety of bN-mAbs including PG9, CH01, CH03, PGT128, and  
437 10-1074 (16). Although the level of protection achieved in the 16,000-person RV144 trial  
438 was statistically significant (31.2%,  $P=0.04$ ) this level was not sufficient for product  
439 registration or clinical deployment. In this regard, the addition of one or more epitopes  
440 recognized by bN-mAbs, such as the PG9 and PGT128 epitopes described in this  
441 report, might improve the antigenic structure and immunogenicity of or recombinant  
442 gp120 such that a level of protection of 50% or more, required for product approval is  
443 achieved. Currently RV144 follow-up studies are in progress that make use of sialic acid  
444 containing gp120 vaccine antigens, produced in normal CHO cells, like those used in  
445 the original RV144 trial (66, 67). These new trials are trying to improve the level of  
446 vaccine efficacy by prolonging the immunization schedule, altering the adjuvant  
447 formulation, and replacing the canarypox vector co-administered with gp120 with  
448 stronger, more virulent virus vectors.

449         Few methods currently exist to produce recombinant proteins incorporating the  
450 Man<sub>5</sub> and Man<sub>9</sub> glycans that are present in the HIV gp120 envelope protein. Expression  
451 of gp120 in yeast results in the incorporation of long chain high-mannose glycans (68),  
452 and insect expression systems produce a preponderance of paucimannose forms  
453 (Man<sub>3-4</sub>) (69). Glycosidase inhibitors (e.g. kifunensine and swainsonine, see Fig. 1) are  
454 effective and useful for producing analytical quantities of proteins with Man<sub>5</sub> and Man<sub>9</sub>

455 intermediates, but are highly toxic and prohibitively expensive for large-scale  
456 biopharmaceutical production (70, 71). Additionally, there exists evidence to suggest a  
457 broad mannosidase inhibitor like kifunensine may negatively impact protein folding  
458 through interference of the Calnexin/Calreticulin pathway (72-75). Glycosaminyl-  
459 transferase knockout cell lines from 293 HEK and CHO cells, referred to as HEK 293  
460 GnT1<sup>-</sup> and CHO Lec1, respectively, have previously been described. They were  
461 generated through random ethyl methanesulfonate (EMS) mutagenesis, zinc finger  
462 methods, or screened for modified glycosylation by resistance to cytotoxic lectin binding  
463 (76-78). These lines lack a functional MGAT1 gene, responsible for the protein GnT1.  
464 Knocking out the MGAT1 gene prevents processing of glycans beyond the  
465 Man<sub>5</sub>GlcNAc<sub>2</sub> stage, resulting in exclusively high-mannose glycoprotein production (28,  
466 29). Such cell lines do not generally grow as robustly as their parental counterparts and  
467 raise potential regulatory issues with potential uncharacterized genetic alterations. In  
468 light of this, there is an unmet need for a cell line suitable for the scalable production of  
469 HIV vaccine immunogens. We have addressed this problem by creating the novel  
470 MGAT1<sup>-</sup> CHO cell line described above. Our data suggests that this cell line possesses  
471 several essential characteristics required for current Good Manufacturing Practices  
472 (cGMP) such as robust growth in well defined serum free medium, the ability to grow to  
473 high cell densities in suspension culture, a well defined mutation of the MGAT1 gene,  
474 and freedom from contamination by adventitious agents. However, the ultimate utility of  
475 this cell line will require characterization of stable cell lines with transfected envelope  
476 proteins where the genetic stability of the transgene as well as the quality and yield of  
477 the final product is determined.

478           Recombinant envelope proteins produced in the MGAT1<sup>-</sup> CHO cell line, such as  
479 the A244-rgp120 described in this report, can be used to test the hypothesis that  
480 previous HIV vaccines such as the AIDSVAX B/E vaccine used in the RV144 trial (12-  
481 14) were ineffective because they lacked the glycan dependent epitopes required to  
482 stimulate the formation of bN-mAbs. While the CHO MGAT1<sup>-</sup> cell line provides a  
483 practical way to produce envelope proteins with several glycan dependent epitopes  
484 recognized by bNAbs not present on gp120s produced in normal CHO cell lines, we do  
485 not yet know whether these epitopes will be immunogenic. Previous gp120 vaccine  
486 trials such as RV144 failed to detect glycan independent VRC01-like antibodies even  
487 though the VRC01 epitope was present on at least two different gp120s used for  
488 immunization. Thus, some epitopes recognized by bNAbs are poorly immunogenic and  
489 additional immunogenicity and formulation studies will likely be required to optimize  
490 virus neutralizing antibody responses to the glycan epitopes of the type described in this  
491 paper. Although the gp120 expression data presented here was derived exclusively  
492 from small-scale transient transfection experiments, we anticipate that the cell line  
493 described in this report will be useful for the development of stable MGAT1<sup>-</sup> CHO cell  
494 lines producing vaccines based on a variety of new concepts. These include guided  
495 immunization to stimulate germline genes encoding bNAbs (79-81), Env proteins  
496 designed with features that enhance antigen processing and presentation (82) as well  
497 as glycopeptide scaffolds that enhance the immunogenicity of epitopes recognized by  
498 bN-mAbs while eliminating non-protective immunodominant epitopes (21).

499

## 500 **Materials and methods**

### 501 **Cell culture**

502           Suspension adapted CHO-S cells were obtained from Thermo Fisher (Thermo  
503 Fisher, Life Technologies, Carlsbad, CA). HEK 293 GnTI<sup>-</sup> suspension adapted cells  
504 were obtained from ATCC (ATCC, Manassas, VA). Stocks of suspension adapted CHO-  
505 S and HEK 293 GnTI<sup>-</sup> cells were maintained in shake flasks (Corning, Corning, NY)  
506 using a Kuhner ISF1-X shaker incubator (Kuhner, Birsfelden, Switzerland). For cell  
507 propagation, shake flask cultures were maintained at 37°C, 8% CO<sub>2</sub>, and 125 rpm.  
508 Static cultures were maintained in 96 or 24 well cell culture dishes and grown in a  
509 Sanyo incubator (Sanyo, Moriguchi, Osaka, Japan) at 37°C and 8% CO<sub>2</sub>.

510           CHO-S cells were maintained in CD-CHO medium supplemented with 0.1%  
511 pluronic acid, 8mM GlutaMax and 1X Hypoxanthine/Thymidine (Thermo Fisher, Life  
512 Technologies, Carlsbad, CA). For cell growth studies, CHO cells were grown in  
513 BalanCD CHO Growth A Medium (Irving Scientific, Santa Ana, CA). HEK 293 GnTI<sup>-</sup>  
514 cells were maintained in Freestyle 293 cell culture media (Life Technologies, Carlsbad,  
515 CA). During transient CHO cell protein production the cells were maintained in OptiCHO  
516 medium supplemented with 0.1% pluronic acid, 2mM GlutaMax and 1X H/T (Thermo  
517 Fisher, Life Technologies, Carlsbad, CA). For protein production experiments the  
518 growth medium was supplemented with CHO Growth A (Molecular Devices, Sunnyvale,  
519 CA), 0.5% Yeastolate (BD, Franklin Lakes, NJ), 2.5% CHO-CD Efficient Feed A; and  
520 0.25mM GlutaMax, 2 g/L Glucose (Sigma-Aldrich St. Louis, MO). Cell counts were  
521 performed using a TC20™ automated cell counter (BioRad, Hercules, CA) with viability  
522 determined by trypan blue (Thermo Fisher, Life Technologies, Carlsbad, CA) exclusion.



523 Cell-doubling time in hours was calculated using the formula:  $((T_2 - T_1) \times \log_2) / (\log(D_2) -$   
524  $\log(D_1))$ , where T = time at count and D = density at count. Cell count numbers used for  
525 doubling time calculation were from the logarithmic phase of growth.

## 526 **Gene sequencing**

527 The sequence of the MGAT1 CHO gene was confirmed using primers based on  
528 the predicted mRNA transcript (XM\_007644560.1 (83)). Genomic DNA was extracted  
529 using the AllPrep kit (Qiagen, Germantown, MD). The MGAT1 gene was PCR amplified  
530 using the primers F\_CAGGCAAGCCAAAGGCAGCCTTG and  
531 R CTCAGGGACTGCAGGCCTGTCTC (Eurofins Genomics, Louisville, KY) with Taq  
532 and dNTPs supplied by New England BioLabs (Ipswich, MA). The PCR product was gel  
533 purified using a Zymoclean kit (Zymo Research, Irvine, CA), then sequenced by Sanger  
534 method at the (UC Berkeley, Berkeley, CA). MGAT1 knockouts were sequenced in the  
535 same manner.

## 536 **CRISPR/Cas9 target design and plasmid preparation**

537 We utilized a CRISPR/Cas9 nuclease vector with an OFP reporter (GeneArt,  
538 Thermo Fischer Scientific, Waltham, MA). Three target sequences to knock out the  
539 CHO-S MGAT1 gene were designed using an online CRISPR RNA Configurator tool  
540 (GE Dharmacon, Lafayette, CO). Target 1: CCCTGGAAGTTGCGGTGGTC. Target 2:  
541 GGGCATTCCAGCCCACAAAG. Target 3: GGCGGAACACCTCACGGGTG. Each  
542 sequence was run in NCBI's BLAST tool for homologies with off-target sites in the CHO  
543 genome. Single stranded DNA oligonucleotides and their complement strands were  
544 synthesized (Eurofins Genomics, Louisville, KY) with extra bases on the 3' ends for  
545 ligation into GeneArt CRISPR nuclease vector (Thermo Fisher, GeneArt, Waltham, MA).

546 The strands were ligated and annealed into a GeneArt CRISPR vector using the  
547 protocol and reagents supplied with the kit. One Shot® TOP10 Chemically Competent  
548 *E. coli* were transformed and plated following the Invitrogen protocol (Thermo Fisher,  
549 Invitrogen, Carlsbad, CA). These were incubated in 5mL LB broth at 37°C in a shaking  
550 incubator at 225rpm overnight. Minipreps were performed according to manufactures  
551 instructions (Qiagen, Germantown, MD) and sent to UC Berkeley DNA Sequencing  
552 Facility (Berkeley, CA) with the U6 primers included in the GeneArt® CRISPR kit to  
553 confirm successful integration of guide sequences. A single 500mL Maxiprep was  
554 performed for each of the three target sequences using PureLink™ Maxiprep kit  
555 (Thermo Fisher, Invitrogen, Carlsbad, CA).

## 556 **Electroporation**

557 Electroporation of CHO cells was performed using a MaxCyte STX scalable  
558 transfection system (MaxCyte Inc., Gaithersburg, MD) according to the manufacturer's  
559 instructions. Briefly, CHO-S cells were maintained at >95% viability prior to transfection.  
560 Cells were pelleted at 250g for 10 minutes, and then re-suspended in MaxCyte EP  
561 buffer (MaxCyte Inc., Gaithersburg, MD) at a density of  $2 \times 10^8$  cells/mL. Transfections  
562 were carried out in the OC-400 processing assembly (MaxCyte Inc., Gaithersburg, MD)  
563 with a total volume of 400 $\mu$ L and  $8 \times 10^7$  total cells. CRISPR/Cas9 exonuclease with  
564 guide sequence plasmid DNA suspended in endotoxin-free water was added to the cells  
565 in EP buffer for a final concentration of 300 $\mu$ g of DNA/mL. The processing assemblies  
566 were then transferred to the MaxCyte STX electroporation device and CHO protocol  
567 was selected using the MaxCyte STX software. Following electroporation, the cells in  
568 electroporation buffer were removed from the processing assembly and placed in

569 125mL Erlenmeyer cell culture shake flasks (Corning, Corning, NY). The flasks were  
570 placed into 37°C incubators with no agitation for 40 minutes. Following the rest period  
571 pre-warmed OPTI-CHO media was added to the flasks for a final cell density of  $4 \times 10^6$   
572 cells/mL. Flasks were then moved to a Kuhner shaker and agitated at 125rpm.

## 573 **Plating, expansion, and culture of CRISPR transfected CHO-S**

### 574 **cells**

575 Twenty-four hours post transfection a 100 $\mu$ L aliquot was taken from each of the  
576 transfected pools to assay for cell viability and orange fluorescent protein (OFP)  
577 expression using a light microscope (Zeiss Axioskop 2, Zeiss, Jena, Germany). Ninety-  
578 six well flat bottom cell culture plates (Corning, Corning, NY) were filled with 50 $\mu$ L of  
579 conditioned CD-CHO media. Each of the three transfected pools were serially diluted  
580 with warmed media to 10 cells/mL and added to five plates per pool in 50 $\mu$ L volumes.  
581 Final calculated cell density was 0.5 cells/well in 100 $\mu$ L of media. Once any single-  
582 colony well reached  $\approx 20\%$  confluency, the contents were transferred to a 24 well cell  
583 culture plate (Corning, Corning, NY) with 500 $\mu$ L of fresh media. When confluency  
584 reached 50%, a 200 $\mu$ L aliquot was removed for testing via a GNA lectin-binding assay.  
585 Following positive lectin binding, cells were moved to a 6 well cell culture plate (Corning,  
586 Corning, NY) with 2mL of media per well. After 5 days of growth in 6 well plates the  
587 GNA assay was repeated. Colonies exhibiting positive lectin binding were moved to  
588 125mL shake flasks with an initial 6mL of media. Daily counts were taken and cell  
589 cultures expanded to maintain  $0.3 \times 10^6$  -  $1.0 \times 10^6$  cells/mL density.

### 590 **Lectin binding assay**

591 Fluorescein labeled *Galanthus nivalis* lectin (GNA), from the snowdrop pea (Vector  
592 Laboratories, Burlingame, CA), was used to detect the cell surface expression of Man<sub>5</sub>  
593 glycoforms. Cell aliquots (200µL) from 24 well plates were pelleted at 3000 rpm for  
594 three minutes. The supernatant was discarded and the cell pellet washed three times  
595 with 500µL of ice-cold 10µM EDTA in (Boston BioProducts, Ashland, MA) phosphate  
596 buffered saline (PBS) (Thermo Fisher, Gibco, Carlsbad, CA). The cell pellet was then  
597 re-suspended in 200µL ice cold 10µM EDTA with PBS with 5µg/mL of GNA-fluorescein.  
598 Samples were shielded from light and incubated on ice with GNA for 30 minutes.  
599 Following incubation, samples were washed three times and re-suspended to a volume  
600 of 50µl in 10µM EDTA PBS. Samples were then examined under a light microscope  
601 (Zeiss Axioskop 2, Zeiss, Jena, Germany) with 495nm wavelength excitation. Wild type  
602 CHO-S cells were used as a negative control and HEK 293 GnT1<sup>-</sup> were used as a  
603 positive control. Representative images were taken on a Leica DM5500 B Widefield  
604 Microscope (Leica Microsystems, Buffalo Grove, IL) at the UC Santa Cruz microscopy  
605 center.

## 606 **Experimental protein production**

607 An expression plasmid containing the gene encoding gp120 from the A244 strain of HIV  
608 (Genbank accession number: MG189369) was selected for transient transfection  
609 experiments. The protein encoded by this gene was identical to that used to produce  
610 the AIDSVAX B/E vaccine used in the RV144 trials (13, 14) with the exception that the  
611 N-linked glycosylation site at N334 was moved to N332. For analytical scale  
612 experiments, a total of  $4 \times 10^5$  cells from each candidate MGAT1<sup>-</sup> CHO line were placed  
613 in 450µl of media in a 24 well cell culture plate. Fugene, 1.7µL, (Promega, Madison, WI)

614 was pre-incubated at room temperature for 30 minutes with 550ng of DNA in a total  
615 volume of 50 $\mu$ L of media. Then 50 $\mu$ L of Fugene/DNA mixture was added to each well  
616 for a final transfected volume of 500 $\mu$ L. Aliquots of supernatant were removed for assay  
617 72 hours post transfection.

618 For preparative scale transient transfection experiments, CHO cells were electroporated  
619 following the above MaxCyte method. Twenty-four hours post electroporation, the  
620 culture was supplemented with 1mM sodium butyrate (Thermo Fisher, Life  
621 Technologies, Carlsbad, CA) and temperature lowered to 32°C. The cultures were fed  
622 daily the equivalent of 3.5% of the original volume with Molecular Devices CHO A Feed  
623 (Molecular Devices, Sunnyvale, CA), 0.5% Yeastolate (BD, Franklin Lakes, NJ), 2.5%  
624 CHO-CD Efficient Feed A; and 0.25mM GlutaMax, 2 g/L Glucose (Sigma-Aldrich St.  
625 Louis, MO). Cultures were run until cell viability dropped below 50%. Supernatant was  
626 harvested by pelleting the cells at 250g for 30 minutes followed by pre-filtration through  
627 Nalgene™ Glass Pre-filters (Thermo Scientific, Waltham, MA) and 0.45 micron SFCA  
628 filtration (Nalgene, Thermo Scientific, Waltham, MA), then stored frozen at -20°C until  
629 purification. Proteins were purified using an N-terminal affinity tag derived from type 1  
630 herpes simplex virus glycoprotein D (gD) as previously described (16).

## 631 **Glycosidase digestion and SDS-PAGE**

632 Endo H and PNGase F (New England BioLabs, Ipswich, MA) digests were  
633 performed per the manufacturer's protocol on 5 $\mu$ g of purified envelope protein using one  
634 unit of glycosidase. Samples were reduced and denatured then digested overnight at  
635 37°C. Digested samples were run on NuPAGE (Thermo Fisher, Invitrogen, Carlsbad,

636 CA) 4-12% BisTris precast gels in MES running buffer then stained with SimplyBlue  
637 stain (Thermo Fisher, Invitrogen, Carlsbad, CA).

## 638 **Fluorescence immunoassays to measure antibody binding**

639 A fluorescence immunoassay (FIA) was used to measure the binding of  
640 polyclonal or monoclonal antibodies to recombinant envelope proteins. For antibody  
641 binding to purified proteins, Greiner Fluortrac 600 microtiter plates (Greiner Bio One,  
642 Kremsmünster, Austria) were coated with 2ug/mL of purified envelope protein overnight  
643 in PBS with shaking. Plates were blocked in PBS + 2.5% BSA (blocking buffer for 90  
644 minutes, then washed four times with PBS containing 0.05% Tween-20 (Sigma). Serial  
645 dilutions of monoclonal antibodies were added in a range from 10ug/mL to  
646 0.0001ug/mL, and then incubated at 25°C for 90 minutes with shaking. After incubation  
647 and washing, 488 Alexa Fluor conjugated anti-human or anti-murine (Invitrogen, CA)  
648 was added at a 1:3000 dilution in PBS + 1% BSA. Plates were incubated for 90 minutes  
649 with shaking then washed four times with 0.05% Tween PBS using an automated plate  
650 washer. Plates were then imaged in a plate spectrophotometer (Envision System,  
651 Perkin Elmer) at excitation and emission wavelengths of 395nm and 490nm  
652 respectively. For antibody binding to unpurified envelope proteins in cell culture  
653 supernatants, Greiner Fluortrac 600 microtiter plates (Greiner Bio-one, Germany) were  
654 coated with 2ug/mL of purified mouse monoclonal antibody to an epitope in the V2  
655 domain (10C10) or the gD purification tag (34.1) overnight in PBS with shaking. Plates  
656 were blocked in PBS + 2.5% BSA blocking buffer for 90 minutes, then washed four  
657 times with PBS containing 0.05% Tween-20 (Sigma). 150µl of 40x diluted supernatant  
658 were then added to each well or 10µg/mL of purified protein in control lanes, then

659 incubated at 25°C for 90minutes with shaking. After incubation and washing, PG9 was  
660 added in a range from 10µg/mL to 0.0001µg/mL, and then incubated at 25°C for  
661 90minutes with shaking. After incubation and washing, fluorescently conjugated anti-  
662 human or anti-murine (Invitrogen, CA) was added at a 1:3000 dilution. Plates were  
663 incubated for 90 minutes with shaking then washed four times with 0.05% Tween PBS  
664 using an automated plate washer. Plates were then imaged in a plate  
665 spectrophotometer (Envision System, Perkin Elmer, Waltham, MA) at excitation and  
666 emission wavelengths of 395nm and 490nm respectively.

667         The broadly neutralizing monoclonal antibody PG9 was purchased from Polymun  
668 (Klosterneuburg, Austria) or produced in-house using 293 HEK cells from a synthetic  
669 gene created on the basis of published sequence data (available from the NIH AIDS  
670 Reagent Program, Germantown, MD). Alexa Fluor 488 conjugated anti-human IgG,  
671 anti-rabbit IgG, and anti-mouse IgG polyclonal antibodies were obtained from Invitrogen  
672 (Invitrogen, Thermo Fisher, Carlsbad, CA)

### 673 **Glycan composition analysis by MALDI-TOF-MS**

674 Glycoprotein sample (~100 µg) suspended in 50 mM ammonium bicarbonate buffer was  
675 incubated with trypsin (5µg, Sigma Aldrich), for 18 h at 37 °C. Digested peptides were  
676 desalted and purified by passing through a C18 sep-pak cartridge after inactivating  
677 trypsin by heating at 95 °C for 5 min. The purified peptides were then treated with  
678 PNGase F (23 IUB milliunits, NEB#P0705, New England BioLabs, Ipswich, MA) at 37  
679 °C for 16 h, to release the N-glycans. The released N-glycans were desalted and  
680 purified from the peptides by C18 sep-pak cartridge followed by freeze-drying. Finally,  
681 the N-glycans were permethylated for 10 min at RT, by using 100 µl of methyl iodide in

682 the presence of NaOH/DMSO base (350  $\mu$ l). The reaction was quenched by adding  
683 water (1 ml) and the permethylated N-glycans were extracted by organic phase  
684 separation using dichloromethane (2 ml). The excess of dichloromethane was removed  
685 by stream of nitrogen and subsequently, prepared for MALDI-MS analysis (84).  
686 Permethylated N-glycans were dissolved in methanol (20  $\mu$ l) and small aliquot (~1  $\mu$ l)  
687 was spotted on to MALDI plate (Opti-TOF-384 well insert, Applied Biosystems, Foster  
688 City, CA) and crystallized with DHB matrix (20 mg/ml in 50 % Methanol/water, Sigma  
689 Aldrich). Data were obtained from AB SCIEX MALDI TOF/TOF 5800 (Applied  
690 Biosystem MDS Analytical Technologies, Foster City, CA) mass spectrometer in  
691 reflector positive-ion mode. Data analysis was performed by using Data Explorer V4.5,  
692 and the assignment of glycan structure was based on the primary mass (m/z) coupled  
693 with MS/MS fragmentation profile using the ExPASy database online and the glycowork  
694 bench software analysis (84, 85).

## 695 **Minute Virus of Mice infectivity assay and sterility testing**

696 IDEXX BioResearch (Columbia, MO) performed a Minute Virus of Mice (MVM)  
697 infectivity assay. Cells were cultured at  $4 \times 10^5$  cells/mL, in 100mL total volume under  
698 conditions described above in a spinner flask for five days. CHO-S and MGAT1<sup>-</sup> CHO  
699 cells were infected with 1 multiplicity of infection (MOI) of MVM prototypic strain (MVMp)  
700 or MVM Cutter strain (MVMc) and evaluated in triplicate. Five mL aliquots were  
701 removed on days 1, 3, and 5, and cells were pelleted by centrifugation and stored at -  
702 20°C. Day 5 samples were evaluated by quantitative polymerase chain reaction (qPCR)  
703 for MVM and 18S using proprietary primers. The qPCR crossing point (CP) values were  
704 reported and copy numbers based upon standard curves.



705 The cell line was tested for a panel of adventitious agents, cell line species, and in-vitro  
706 virus contamination by IDEXX BioResearch (Columbia, MO, USA) using a PCR based  
707 protocol described in supplemental materials.

## 708 **Acknowledgments**

709 Dr. Benjamin Abrams, UCSC Life Science Microscopy Center, provided technical  
710 support. Dr. Matthew H. Myles at IDEXX BioResearch developed and performed the  
711 MVM infectivity assays. Chelsea Didingler of the Department of Biomolecular  
712 Engineering at UCSC assisted with text and manuscript preparation.

713

## 714 **References**

- 715 1. Kwong PD, Wyatt R, Robinson J, Sweet RW, Sodroski J, Hendrickson WA.  
716 Structure of an HIV gp120 envelope glycoprotein in complex with the CD4 receptor and  
717 a neutralizing human antibody. *Nature*. 1998;393(6686):648-59.
- 718 2. Julien J-P, Cupo A, Sok D, Stanfield RL, Lyumkis D, Deller MC, et al. Crystal  
719 Structure of a Soluble Cleaved HIV-1 Envelope Trimer. *Science*. 2013;342(6165):1477-  
720 83.
- 721 3. McLellan JS, Pancera M, Carrico C, Gorman J, Julien JP, Khayat R, et al.  
722 Structure of HIV-1 gp120 V1/V2 domain with broadly neutralizing antibody PG9. *Nature*.  
723 2011;480(7377):336-43.
- 724 4. Zhou T, Georgiev I, Wu X, Yang ZY, Dai K, Finzi A, et al. Structural basis for  
725 broad and potent neutralization of HIV-1 by antibody VRC01. *Science*.  
726 2010;329(5993):811-7.
- 727 5. Ward AB, Wilson IA. Insights into the trimeric HIV-1 envelope glycoprotein  
728 structure. *Trends in biochemical sciences*. 2015;40(2):101-7.
- 729 6. Lavine CL, Lao S, Montefiori DC, Haynes BF, Sodroski JG, Yang X, et al. High-  
730 Mannose Glycan-Dependent Epitopes Are Frequently Targeted in Broad Neutralizing  
731 Antibody Responses during Human Immunodeficiency Virus Type 1 Infection. *Journal of*  
732 *Virology*. 2012;86(4):2153-64.
- 733 7. Horiya S, MacPherson IS, Krauss IJ. Recent strategies targeting HIV glycans in  
734 vaccine design. *Nat Chem Biol*. 2014;10(12):990-9.
- 735 8. Doores KJ, Burton DR. Variable Loop Glycan Dependency of the Broad and  
736 Potent HIV-1-Neutralizing Antibodies PG9 and PG16. *Journal of Virology*.  
737 2010;84(20):10510-21.

- 738 9. Walker LM, Huber M, Doores KJ, Falkowska E, Pejchal R, Julien JP, et al. Broad  
739 neutralization coverage of HIV by multiple highly potent antibodies. *Nature*.  
740 2011;477(7365):466-70.
- 741 10. Kong L, Lee JH, Doores KJ, Murin CD, Julien JP, McBride R, et al. Supersite of  
742 immune vulnerability on the glycosylated face of HIV-1 envelope glycoprotein gp120.  
743 *Nature structural & molecular biology*. 2013;20(7):796-803.
- 744 11. Murin CD, Julien JP, Sok D, Stanfield RL, Khayat R, Cupo A, et al. Structure of  
745 2G12 Fab2 in complex with soluble and fully glycosylated HIV-1 Env by negative-stain  
746 single-particle electron microscopy. *J Virol*. 2014;88(17):10177-88.
- 747 12. Rerks-Ngarm S, Pitisuttithum P, Nitayaphan S, Kaewkungwal J, Chiu J, Paris  
748 R, et al. Vaccination with ALVAC and AIDSVAX to Prevent HIV-1 Infection in Thailand.  
749 *New England Journal of Medicine*. 2009;361(23):2209-20.
- 750 13. Berman PW. Development of bivalent rgp120 vaccines to prevent HIV type 1  
751 infection. *AIDS research and human retroviruses*. 1998;14 Suppl 3:S277-89.
- 752 14. Berman PW, Huang W, Riddle L, Gray AM, Wrin T, Vennari J, et al.  
753 Development of Bivalent (B/E) Vaccines Able to Neutralize CCR5-Dependent Viruses  
754 from the United States and Thailand. *Virology*. 1999;265(1):1-9.
- 755 15. Paris RM, Kim JH, Robb ML, Michael NL. Prime–boost immunization with  
756 poxvirus or adenovirus vectors as a strategy to develop a protective vaccine for HIV-1.  
757 *Expert Review of Vaccines*. 2010;9(9):1055-69.
- 758 16. Yu B, Morales JF, O'Rourke SM, Tatsuno GP, Berman PW. Glycoform and Net  
759 Charge Heterogeneity in gp120 Immunogens Used in HIV Vaccine Trials. *PLoS ONE*.  
760 2012;7(8):e43903.
- 761 17. Geyer H, Holschbach C, Hunsmann G, Schneider J. Carbohydrates of human  
762 immunodeficiency virus. Structures of oligosaccharides linked to the envelope  
763 glycoprotein 120. *Journal of Biological Chemistry*. 1988;263(24):11760-7.
- 764 18. Doores KJ, Bonomelli C, Harvey DJ, Vasiljevic S, Dwek RA, Burton DR, et al.  
765 Envelope glycans of immunodeficiency virions are almost entirely oligomannose  
766 antigens. *Proceedings of the National Academy of Sciences*. 2010;107(31):13800-5.
- 767 19. Bonomelli C, Doores KJ, Dunlop DC, Thaney V, Dwek RA, Burton DR, et al. The  
768 Glycan Shield of HIV Is Predominantly Oligomannose Independently of Production  
769 System or Viral Clade. *PLOS ONE*. 2011;6(8):e23521.
- 770 20. Coss KP, Vasiljevic S, Pritchard LK, Krumm SA, Glaze M, Madzorera S, et al.  
771 HIV-1 Glycan Density Drives the Persistence of the Mannose Patch within an Infected  
772 Individual. *Journal of Virology*. 2016;90(24):11132-44.
- 773 21. Morales JF, Morin TJ, Yu B, Tatsuno GP, O'Rourke SM, Theolis R, et al. HIV-1  
774 Envelope Proteins and V1/V2 Domain Scaffolds with Mannose-5 to Improve the  
775 Magnitude and Quality of Protective Antibody Responses to HIV-1. *The Journal of*  
776 *biological chemistry*. 2014;289(30):20526-42.
- 777 22. Lin Y-C, Boone M, Meuris L, Lemmens I, Van Roy N, Soete A, et al. Genome  
778 dynamics of the human embryonic kidney 293 lineage in response to cell biology  
779 manipulations. 2014;5:4767.
- 780 23. Stepanenko AA, Dmitrenko VV. HEK293 in cell biology and cancer research:  
781 phenotype, karyotype, tumorigenicity, and stress-induced genome-phenotype evolution.  
782 *Gene*. 2015;569(2):182-90.

- 783 24. Kim JY, Kim Y-G, Lee GM. CHO cells in biotechnology for production of  
784 recombinant proteins: current state and further potential. *Applied microbiology and*  
785 *biotechnology*. 2012;93(3):917-30.
- 786 25. Kunert R, Reinhart D. Advances in recombinant antibody manufacturing. *Applied*  
787 *microbiology and biotechnology*. 2016;100:3451-61.
- 788 26. Möller J, Pörtner R. Model-Based Design of Process Strategies for Cell Culture  
789 Bioprocesses: State of the Art and New Perspectives. In: Gowder SJT, editor. *New*  
790 *Insights into Cell Culture Technology*. Rijeka: InTech; 2017. p. Ch. 05.
- 791 27. Bieberich E. Synthesis, processing, and function of N-glycans in N-glycoproteins.  
792 *Advances in neurobiology*. 2014;9:47-70.
- 793 28. Moremen KW, Tiemeyer M, Nairn AV. Vertebrate protein glycosylation: diversity,  
794 synthesis and function. *Nature reviews Molecular cell biology*. 2012;13(7):448-62.
- 795 29. Schwarz F, Aebi M. Mechanisms and principles of N-linked protein glycosylation.  
796 *Current opinion in structural biology*. 2011;21(5):576-82.
- 797 30. Schachter H. The 'yellow brick road' to branched complex N-glycans.  
798 *Glycobiology*. 1991;1(5):453-61.
- 799 31. Bork K, Horstkorte R, Weidemann W. Increasing the sialylation of therapeutic  
800 glycoproteins: the potential of the sialic acid biosynthetic pathway. *Journal of*  
801 *pharmaceutical sciences*. 2009;98(10):3499-508.
- 802 32. Berger M, Kaup M, Blanchard V. Protein Glycosylation and Its Impact on  
803 Biotechnology. In: Hu WS, Zeng A-P, editors. *Genomics and Systems Biology of*  
804 *Mammalian Cell Culture*. Berlin, Heidelberg: Springer Berlin Heidelberg; 2012. p. 165-  
805 85.
- 806 33. Emr S, Glick BS, Linstedt AD, Lippincott-Schwartz J, Luini A, Malhotra V, et al.  
807 Journeys through the Golgi--taking stock in a new era. *The Journal of cell biology*.  
808 2009;187(4):449-53.
- 809 34. Llop E, Gutierrez-Gallego R, Segura J, Mallorqui J, Pascual JA. Structural  
810 analysis of the glycosylation of gene-activated erythropoietin (epoetin delta, Dynepo).  
811 *Analytical biochemistry*. 2008;383(2):243-54.
- 812 35. Cummings RD. The repertoire of glycan determinants in the human glycome.  
813 *Molecular bioSystems*. 2009;5(10):1087-104.
- 814 36. Li H, d'Anjou M. Pharmacological significance of glycosylation in therapeutic  
815 proteins. *Current opinion in biotechnology*. 2009;20(6):678-84.
- 816 37. Mizuochi T, Spellman MW, Larkin M, Solomon J, Basa LJ, Feizi T. Carbohydrate  
817 structures of the human-immunodeficiency-virus (HIV) recombinant envelope  
818 glycoprotein gp120 produced in Chinese-hamster ovary cells. *The Biochemical journal*.  
819 1988;254(2):599-603.
- 820 38. Reitter JN, Means RE, Desrosiers RC. A role for carbohydrates in immune  
821 evasion in AIDS. *Nat Med*. 1998;4(6):679-84.
- 822 39. Go EP, Hewawasam G, Liao HX, Chen H, Ping LH, Anderson JA, et al.  
823 Characterization of glycosylation profiles of HIV-1 transmitted/founder envelopes by  
824 mass spectrometry. *J Virol*. 2011;85(16):8270-84.
- 825 40. Cao L, Diedrich JK, Kulp DW, Pauthner M, He L, Park S-KR, et al. Global site-  
826 specific N-glycosylation analysis of HIV envelope glycoprotein. 2017;8:14954.
- 827 41. Go EP, Herschhorn A, Gu C, Castillo-Menendez L, Zhang S, Mao Y, et al.  
828 Comparative Analysis of the Glycosylation Profiles of Membrane-Anchored HIV-1

- 829 Envelope Glycoprotein Trimers and Soluble gp140. *Journal of Virology*.  
830 2015;89(16):8245-57.
- 831 42. Gottlieb C, Skinner SAM, Kornfeld S. Isolation of a Clone of Chinese Hamster  
832 Ovary Cells Deficient in Plant Lectin-Binding Sites. *Proceedings of the National*  
833 *Academy of Sciences*. 1974;71(4):1078-82.
- 834 43. Stanley P, Narasimhan S, Siminovitch L, Schachter H. Chinese hamster ovary  
835 cells selected for resistance to the cytotoxicity of phytohemagglutinin are deficient in a  
836 UDP-N-acetylglucosamine--glycoprotein N-acetylglucosaminyltransferase activity.  
837 *Proceedings of the National Academy of Sciences of the United States of America*.  
838 1975;72(9):3323-7.
- 839 44. Hsu Patrick D, Lander Eric S, Zhang F. Development and Applications of  
840 CRISPR-Cas9 for Genome Engineering. *Cell*.157(6):1262-78.
- 841 45. Sander JD, Joung JK. CRISPR-Cas systems for editing, regulating and targeting  
842 genomes. *Nat Biotech*. 2014;32(4):347-55.
- 843 46. GenBank [Internet]. 2016.
- 844 47. Binley JM, Ban Y-EA, Crooks ET, Eggink D, Osawa K, Schief WR, et al. Role of  
845 Complex Carbohydrates in Human Immunodeficiency Virus Type 1 Infection and  
846 Resistance to Antibody Neutralization. *Journal of Virology*. 2010;84(11):5637-55.
- 847 48. Kaku H, Goldstein IJ. [27] Snowdrop lectin. *Methods in enzymology*. 179:  
848 Academic Press; 1989. p. 327-31.
- 849 49. Zhu X, Borchers C, Bienstock RJ, Tomer KB. Mass Spectrometric  
850 Characterization of the Glycosylation Pattern of HIV-gp120 Expressed in CHO Cells.  
851 *Biochemistry*. 2000;39(37):11194-204.
- 852 50. Go EP, Liao H-X, Alam SM, Hua D, Haynes BF, Desaire H. Characterization of  
853 Host-Cell Line Specific Glycosylation Profiles of Early Transmitted/Founder HIV-1  
854 gp120 Envelope Proteins. *Journal of proteome research*. 2013;12(3):1223-34.
- 855 51. Kwong PD, Mascola JR, Nabel GJ. Broadly neutralizing antibodies and the  
856 search for an HIV-1 vaccine: the end of the beginning. *Nature Reviews Immunology*.  
857 2013;13:693.
- 858 52. Li Y, O'Dell S, Walker LM, Wu X, Guenaga J, Feng Y, et al. Mechanism of  
859 neutralization by the broadly neutralizing HIV-1 monoclonal antibody VRC01. *J Virol*.  
860 2011;85(17):8954-67.
- 861 53. Moody M, Alves W, Varghese J, Khan F. Mouse Minute Virus (MMV)  
862 Contamination--A Case Study: Detection, Root Cause Determination, and Corrective  
863 Actions. *PDA journal of pharmaceutical science and technology*. 2011;65(6):580-8.
- 864 54. Nam HJ, Gurda-Whitaker B, Gan WY, Ilaria S, McKenna R, Mehta P, et al.  
865 Identification of the sialic acid structures recognized by minute virus of mice and the role  
866 of binding affinity in virulence adaptation. *The Journal of biological chemistry*.  
867 2006;281(35):25670-7.
- 868 55. Halder S, Cotmore S, Heimburg-Molinaro J, Smith DF, Cummings RD, Chen X,  
869 et al. Profiling of Glycan Receptors for Minute Virus of Mice in Permissive Cell Lines  
870 Towards Understanding the Mechanism of Cell Recognition. *PLOS ONE*.  
871 2014;9(1):e86909.
- 872 56. Huang L-Y, Halder S, Agbandje-McKenna M. Parvovirus Glycan Interactions.  
873 *Current opinion in virology*. 2014;0:108-18.

- 874 57. Garcin PO, Panté N. The minute virus of mice exploits different endocytic  
875 pathways for cellular uptake. *Virology*. 2015;482:157-66.
- 876 58. Besselsen DG, Pintel DJ, Purdy GA, Besch-Williford CL, Franklin CL, Hook RR,  
877 et al. Molecular characterization of newly recognized rodent parvoviruses. *Journal of*  
878 *General Virology*. 1996;77(5):899-911.
- 879 59. Moore JP, McKeating JA, Jones IM, Stephens PE, Clements G, Thomson S, et  
880 al. Characterization of recombinant gp120 and gp160 from HIV-1: binding to monoclonal  
881 antibodies and soluble CD4. *AIDS*. 1990;4(4):307-16.
- 882 60. Jones DH, McBride BW, Roff MA, Farrar GH. Efficient purification and rigorous  
883 characterisation of a recombinant gp120 for HIV vaccine studies. *Vaccine*.  
884 1995;13(11):991-9.
- 885 61. Schnittman SM, Lane HC, Roth J, Burrows A, Folks TM, Kehrl JH, et al.  
886 Characterization of GP120 binding to CD4 and an assay that measures ability of sera to  
887 inhibit this binding. *The Journal of Immunology*. 1988;141(12):4181.
- 888 62. Li Y, Luo L, Rasool N, Kang CY. Glycosylation is necessary for the correct  
889 folding of human immunodeficiency virus gp120 in CD4 binding. *J Virol*. 1993;67(1):584-  
890 8.
- 891 63. Rizzuto CD, Wyatt R, Hernandez-Ramos N, Sun Y, Kwong PD, Hendrickson WA,  
892 et al. A conserved HIV gp120 glycoprotein structure involved in chemokine receptor  
893 binding. *Science*. 1998;280(5371):1949-53.
- 894 64. Pritchard LK, Vasiljevic S, Ozorowski G, Seabright GE, Cupo A, Ringe R, et al.  
895 Structural Constraints Determine the Glycosylation of HIV-1 Envelope Trimers. *Cell*  
896 *reports*. 2015;11(10):1604-13.
- 897 65. Wei X, Decker JM, Wang S, Hui H, Kappes JC, Wu X, et al. Antibody  
898 neutralization and escape by HIV-1. *Nature*. 2003;422(6929):307-12.
- 899 66. Wang Z, Lorin C, Koutsoukos M, Franco D, Bayat B, Zhang Y, et al.  
900 Comprehensive Characterization of Reference Standard Lots of HIV-1 Subtype C  
901 Gp120 Proteins for Clinical Trials in Southern African Regions. *Vaccines*. 2016;4(2).
- 902 67. Zambonelli C, Dey AK, Hilt S, Stephenson S, Go EP, Clark DF, et al. Generation  
903 and Characterization of a Bivalent HIV-1 Subtype C gp120 Protein Boost for Proof-of-  
904 Concept HIV Vaccine Efficacy Trials in Southern Africa. *PLOS ONE*.  
905 2016;11(7):e0157391.
- 906 68. Munro S. What can yeast tell us about N-linked glycosylation in the Golgi  
907 apparatus? *FEBS Letters*. 2001;498(2-3):223-7.
- 908 69. Walski T, De Schutter K, Damme E, Smaghe G. Diversity and functions of  
909 protein glycosylation in insects 2017. 21-34 p.
- 910 70. Elbein AD, Solf R, Dorling PR, Vosbeck K. Swainsonine: an inhibitor of  
911 glycoprotein processing. *Proceedings of the National Academy of Sciences of the*  
912 *United States of America*. 1981;78(12):7393-7.
- 913 71. Chang VT, Crispin M, Aricescu AR, Harvey DJ, Nettleship JE, Fennelly JA, et al.  
914 Glycoprotein structural genomics: solving the glycosylation problem. *Structure (London,*  
915 *England : 1993)*. 2007;15(3):267-73.
- 916 72. Tokunaga F, Hara K, Koide T. N-linked oligosaccharide processing, but not  
917 association with calnexin/calreticulin is highly correlated with endoplasmic reticulum-  
918 associated degradation of antithrombin Glu313-deleted mutant. *Archives of*  
919 *biochemistry and biophysics*. 2003;411(2):235-42.

- 920 73. Helenius A, Aebi M. Roles of N-linked glycans in the endoplasmic reticulum.  
921 Annual review of biochemistry. 2004;73:1019-49.
- 922 74. Mast SW, Moremen KW. Family 47 alpha-mannosidases in N-glycan processing.  
923 Methods in enzymology. 2006;415:31-46.
- 924 75. Lederkremer GZ. Glycoprotein folding, quality control and ER-associated  
925 degradation. Current opinion in structural biology. 2009;19(5):515-23.
- 926 76. Sealover NR, Davis AM, Brooks JK, George HJ, Kayser KJ, Lin N. Engineering  
927 Chinese hamster ovary (CHO) cells for producing recombinant proteins with simple  
928 glycoforms by zinc-finger nuclease (ZFN)-mediated gene knockout of mannosyl (alpha-  
929 1,3-)-glycoprotein beta-1,2-N-acetylglucosaminyltransferase (Mgat1). J Biotechnol.  
930 2013;167(1):24-32.
- 931 77. Puthalakath H, Burke J, Gleeson PA. Glycosylation defect in Lec1 Chinese  
932 hamster ovary mutant is due to a point mutation in N-acetylglucosaminyltransferase I  
933 gene. The Journal of biological chemistry. 1996;271(44):27818-22.
- 934 78. Stanley P. Chinese hamster ovary cell mutants with multiple glycosylation  
935 defects for production of glycoproteins with minimal carbohydrate heterogeneity.  
936 Molecular and cellular biology. 1989;9(2):377-83.
- 937 79. Kwong Peter D, Mascola John R. Human Antibodies that Neutralize HIV-1:  
938 Identification, Structures, and B Cell Ontogenies. Immunity.37(3):412-25.
- 939 80. Klein F, Mouquet H, Dosenovic P, Scheid JF, Scharf L, Nussenzweig MC.  
940 Antibodies in HIV-1 Vaccine Development and Therapy. Science.  
941 2013;341(6151):1199-204.
- 942 81. Haynes BF, Kelsoe G, Harrison SC, Kepler TB. B-cell-lineage immunogen  
943 design in vaccine development with HIV-1 as a case study. Nature biotechnology.  
944 2012;30:423.
- 945 82. Yu B, Fonseca DPAJ, O'Rourke SM, Berman PW. Protease Cleavage Sites in  
946 HIV-1 gp120 Recognized by Antigen Processing Enzymes Are Conserved and Located  
947 at Receptor Binding Sites. Journal of Virology. 2010;84(3):1513-26.
- 948 83. Coordinators NR. Database resources of the National Center for Biotechnology  
949 Information. Nucleic Acids Research. 2016;44(Database issue):D7-D19.
- 950 84. Shajahan A, Supekar NT, Heiss C, Ishihara M, Azadi P. Tool for Rapid Analysis  
951 of Glycopeptide by Permethylation via One-Pot Site Mapping and Glycan Analysis.  
952 Analytical chemistry. 2017;89(20):10734-43.
- 953 85. Sheikh MO, Thieker D, Chalmers G, Schafer CM, Ishihara M, Azadi P, et al. O2  
954 sensing-associated glycosylation exposes the F-box-combining site of the Dictyostelium  
955 Skp1 subunit in E3 ubiquitin ligases. The Journal of biological chemistry.  
956 2017;292(46):18897-915.

957

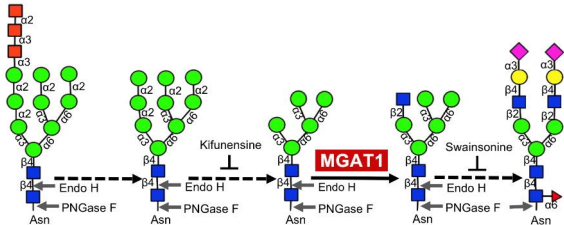

■ N-Acetylglucosamine

● Mannose

● Galactose

◆ N-acetylneuraminic acid  
(sialic acid)

■ Glucose

▶ Fucose

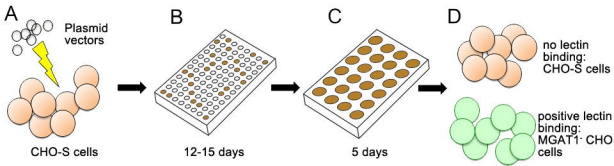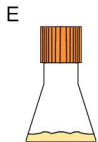

Expansion to shake flasks

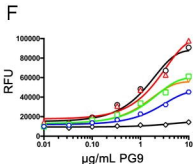

Screen for PG9 binding

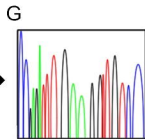

Sanger sequencing of MGAT1 gene



GnTI<sup>-</sup> 293 HEK

CHO-S

MGAT1<sup>-</sup> CHO

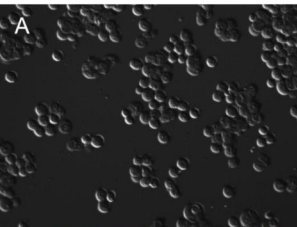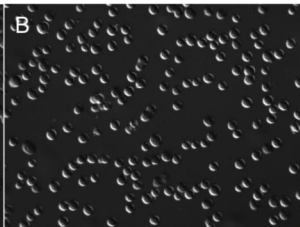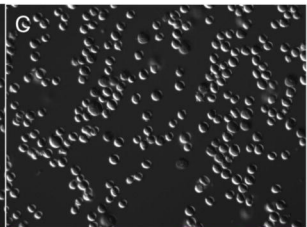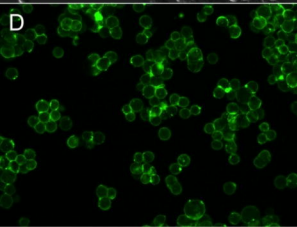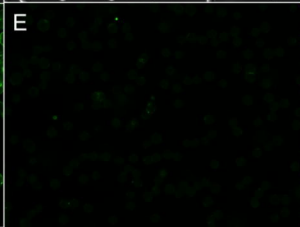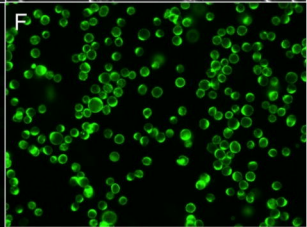

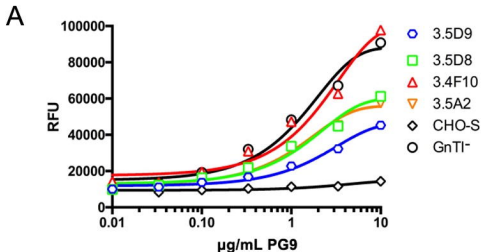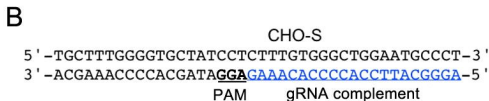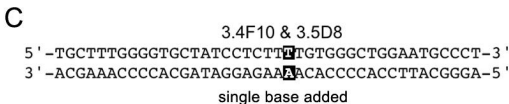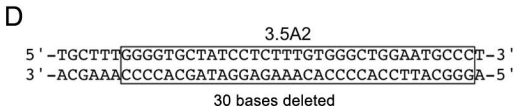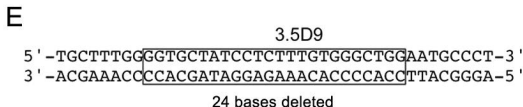

**A**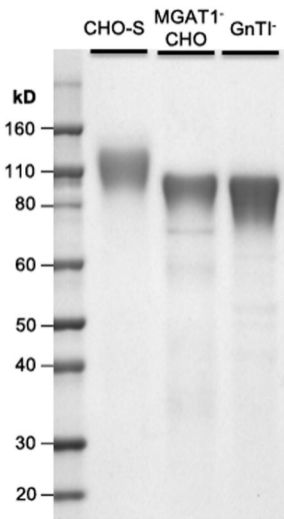**B**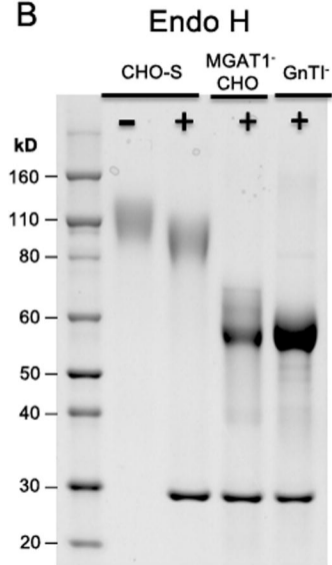**C**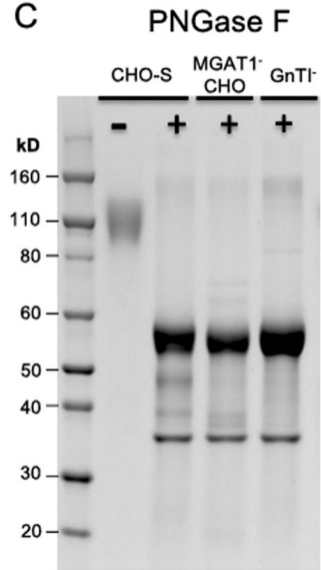

A

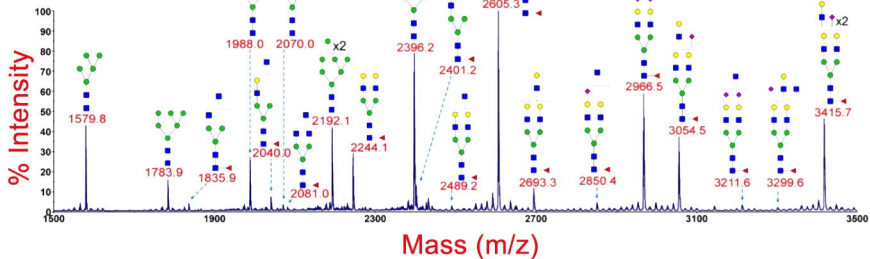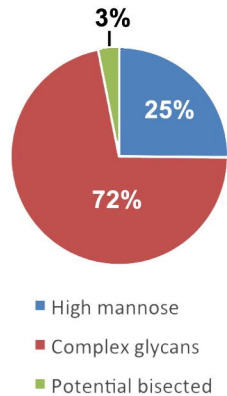

B

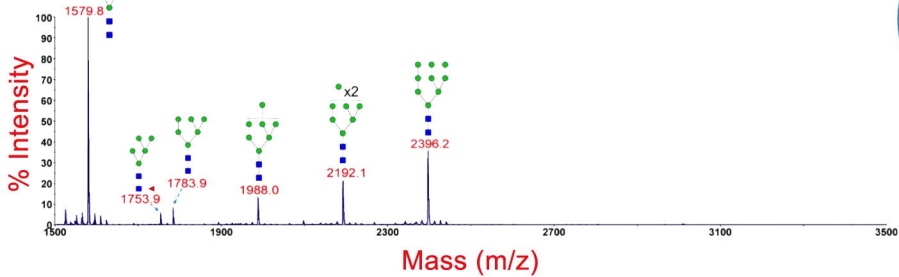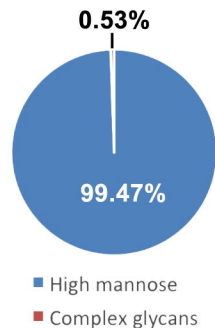

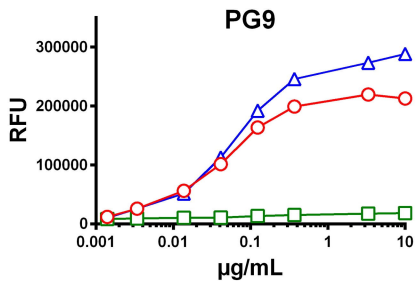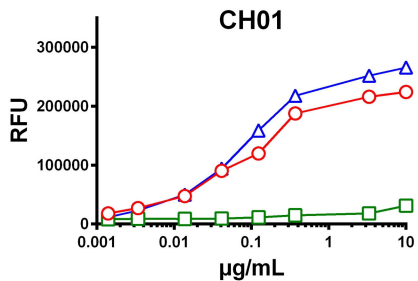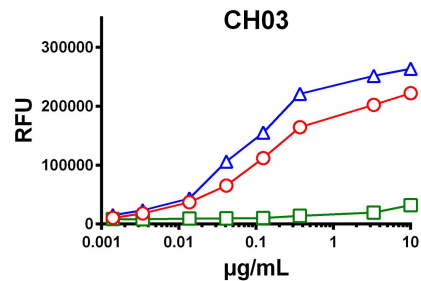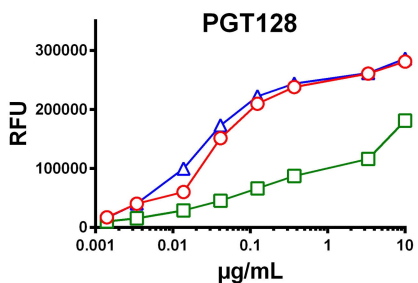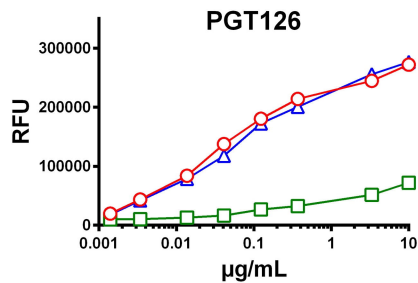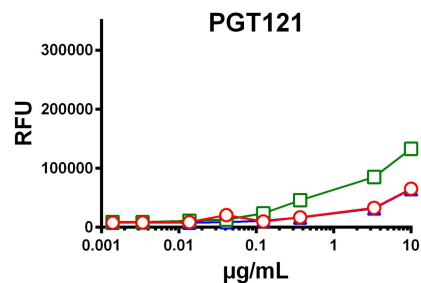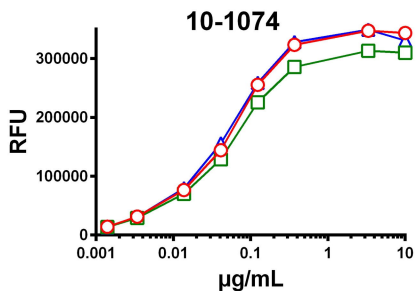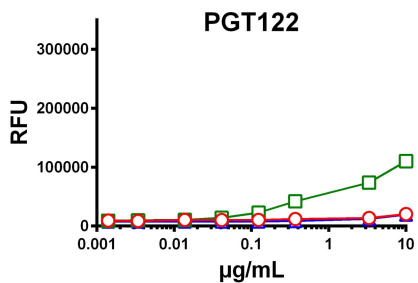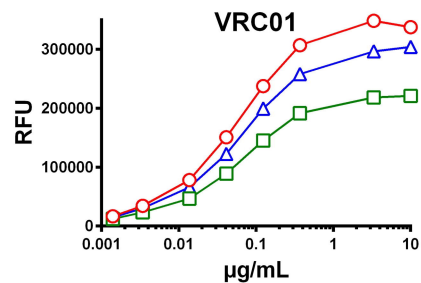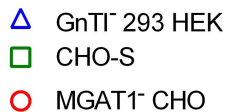

Source: https://www.biorxiv.org/content/10.1101/368357v1.full.pdf
